# Supplementary material for: Effect of the Pandemic Outbreak on ICU-Associated Infections and Antibiotic Prescription Trends in Non-COVID19 Acute Respiratory Failure Patients
Source: MDPI journal article supplement (doi:10.3390/jcm11237080), 2022-11-29

**Supplemental Table S1.** Multivariate Analysis on risk factors associated to total antimicrobial use.

|                                                      | Unstandardized coefficient |                  | Standardized coefficient | P value |
|------------------------------------------------------|----------------------------|------------------|--------------------------|---------|
|                                                      | <b>B</b>                   | <b>Std Error</b> | <b>Beta</b>              |         |
| <b>Constant</b>                                      | 15.549                     | 5.907            |                          | 0.010   |
| <b>SAPS II (value)</b>                               | -0.190                     | 0.094            | -0.203                   | 0.047   |
| <b>Heart Disease (yes)</b>                           | -1.528                     | 2.770            | -0.048                   | 0.583   |
| <b>Pneumopathy (yes)</b>                             | 1.644                      | 3.223            | 0.046                    | 0.612   |
| <b>DM (yes)</b>                                      | -0.943                     | 3.074            | -0.026                   | 0.760   |
| <b>CKD (yes)</b>                                     | 5.558                      | 3.986            | 0.139                    | 0.167   |
| <b>Year of admission (PP)</b>                        | 8.868                      | 2.851            | 0.280                    | 0.003   |
| <b>ICU stay (days)</b>                               | 1.239                      | 0.355            | 0.551                    | 0.001   |
| <b>IMV duration (days)</b>                           | -0.047                     | 0.511            | -0.015                   | 0.927   |
| <b>Acute respiratory failure after surgery (yes)</b> | -8.108                     | 3.072            | -0.256                   | 0.010   |

Reference in parenthesis; PP=pre-Pandemic; SAPS II, Simplified Acute Physiology Score II; DM, diabetes mellitus; CKD, chronic kidney disease; Intra-Pandemic (2020); ICU, intensive care unit; IMV, invasive mechanical ventilation.

**Supplemental Table S2:** Microbial isolations in blood, respiratory tract and urinary tract samples, divided in families in the two years.

| PP: Pre-Pandemic                               |           | IP: Intra-Pandemic |                                                |
|------------------------------------------------|-----------|--------------------|------------------------------------------------|
| FAMILIES                                       | n. (%)    | n. (%)             | FAMILIES                                       |
| <i>Staphylococcus spp.</i>                     | 23 (35.4) | 18 (28.1)          | <i>Candida spp.</i> §                          |
| <i>Enterobacteriaceae</i>                      | 11 (16.9) | 13 (20.3)          | <i>Staphylococcus spp.</i>                     |
| <i>Pseudomonas aeruginosa</i>                  | 10 (15.4) | 9 (14.1)           | <i>Others*</i>                                 |
| <i>Others*</i>                                 | 6 (9.2)   | 8 (12.5)           | <i>Pseudomonas aeruginosa</i>                  |
| <i>Acinetobacter baumannii</i>                 | 3 (4.6)   | 5 (7.8)            | <i>Enterobacteriaceae</i>                      |
| <i>Morganella morganii</i>                     | 3 (4.6)   | 5 (7.8)            | <i>Stenotrophomonas maltophilia</i>            |
| <i>Streptococcus spp.</i>                      | 2 (3.1)   | 2 (3.1)            | <i>Streptococcus spp.</i>                      |
| <i>Candida spp.</i>                            | 2 (3.1)   | 2 (3.1)            | <i>Enterococcus faecalis</i>                   |
| <i>Stenotrophomonas maltophilia</i>            | 2 (3.1)   | 1 (1.6)            | <i>Klebsiella spp.</i>                         |
| <i>Enterococcus faecalis</i>                   | 1 (1.5)   | 1 (1.6)            | <i>Haemophilus influenzae</i>                  |
| <i>Klebsiella spp.</i>                         | 1 (1.5)   | 0 (0)              | <i>Acinetobacter baumannii</i>                 |
| <i>Haemophilus influenzae</i>                  | 1 (1.5)   | 0 (0)              | <i>Morganella morganii</i>                     |
| <b>Total number of isolated microorganisms</b> | 65        | 64                 | <b>Total number of isolated microorganisms</b> |

Legionella pneumophila, Proteus mirabilis, Corynebacterium spp., Serratia marcescens, Actinomyces, Lactobacillus casei, Citrobacter freundii, Alcaligenes xylosoxidans, Propionibacterium acnes. § Chi-square test with  $p < 0.05$  comparing the relative percentage in the two groups.

**Figure S1:** Relative percentage of isolated microorganisms' classes in the cumulative positive cultures, bloodstream cultures, respiratory tract cultures and urinary tract cultures in the two years of analysis. PP, pre-pandemic; IP, intra-pandemic.

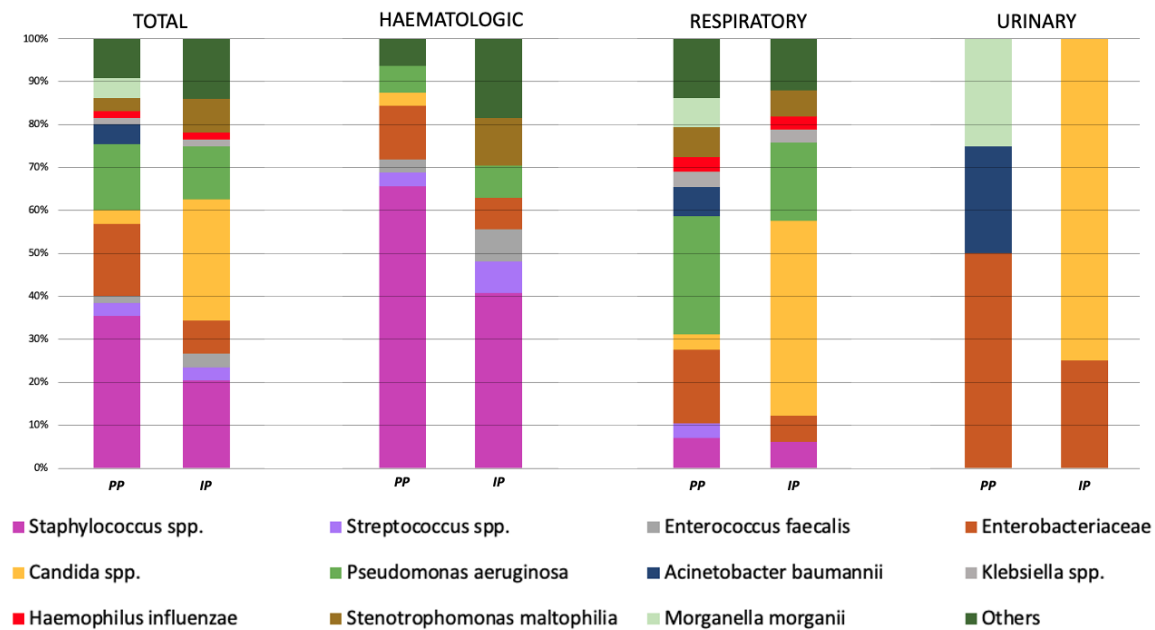

Supplement: s1 [file s1]
